# Supplementary material for: Facile synthesis of covalent organic framework derived Fe-COFs composites as a peroxidase-mimicking artificial enzyme
Source: Royal Society of Chemistry journal article supplement (doi:10.1039/d0na00025f), 2020-01-01
Supplement: d0na00025f1.pdf [file d0na00025f1.pdf]

## Electronic Supplementary Information

### **Facile synthesis of covalent organic framework derived composite Fe-COF as a peroxidase-mimicking artificial enzyme**

Liya Zhou,<sup>a</sup> Xucong Luo,<sup>a</sup> Jing Gao,<sup>a</sup> Guanhua Liu,<sup>a</sup> Li Ma,<sup>a</sup> Ying He,<sup>a</sup> Zhihong Huang,<sup>a</sup> and Yanjun Jiang <sup>\* a b</sup>

<sup>a</sup> School of Chemical Engineering and Technology, Hebei University of Technology,  
8 Guangrong Road, Hongqiao District, Tianjin, 300130, P. R. China

<sup>b</sup> National-Local Joint Engineering Laboratory for Energy Conservation of Chemical  
Process Integration and Resources Utilization, Hebei University of Technology,  
Tianjin 300130, China

#### **Corresponding Author**

\* E-mail: yanjunjiang@hebut.edu.cn; jgao@hebut.edu.cn;

Fax: 86-22-60204294; Tel: 86-22-60204945

## Experimental section

### Materials

Hydrogen peroxide ( $\text{H}_2\text{O}_2$ , 30%) and ferrous sulfate heptahydrate ( $\text{FeSO}_4 \cdot 7\text{H}_2\text{O}$ ) were purchased from Tianjin Chemical Reagent Company (Tianjin, China). 1,3,5-tris-(4-aminophenyl)benzene (TAPB) was purchased from Shanghai Dibai Chemical Technology Co., Ltd. 1,3,5-Benzenetricarboxaldehyde (BTCA) was received from Shanghai Bide Pharmaceutical Technology Co., Ltd. (Shanghai, China). 3,3',5,5'-Tetramethylbenzidine (TMB) was obtained from Aladdin reagent Co., Ltd. Deionized water was produced by a Millipore Milli-Q water purification system. All other chemicals were bought from Sinopharm Reagent Co., Ltd (shanghai, China) and were analytical purity without further purification.

### Characterization.

The microstructure and the morphology of the synthetic RT-COF-1 and Fe-COF nanocomposite were characterized by the scanning electron microscopy (SEM, Nova Nano SEM450). Ultraviolet–visible (UV–vis) absorption spectra were carried out on a Cary 60 spectrophotometer (Agilent, USA). Fe contents of the samples were determined by inductively coupled plasma spectroscopy (ICP). ICP was carried out on a Prodigy (LEEMANLABS, USA). Fourier-transform infrared spectroscopy (FT-IR) spectra were performed with a Bruker VECTOR22 spectrometer. Thermogravimetric analyses (TGA) were obtained on a Netzsch TG 209 F3 in the temperature range of 50 to 800 °C with a heating ramp of 10 °C/min under the  $\text{N}_2$  flow. An X-ray photoelectron spectrometer (XPS, Thermo Scientific K-Alpha) was used to determine the surface chemical states of elements. Fluoromax-4 spectrometer (Horiba, France) was used to measure fluorescence. Raman spectra were measured on a Renishaw InVia Raman Microscope, using a 532 nm excitation laser, between 100 and 3200  $\text{cm}^{-1}$ . Nitrogen adsorption/desorption were measured using a Micromeritics ASAP 2020 analyzer. The samples were degassed at 150 °C for at least 12 h under vacuum conditions before the

test. The Brunauer-Emmett-Teller (BET) method was used to evaluate the specific surface areas.

### **Synthesis of RT-COF-1.**

Inspired by Alejandro *et al*'s work<sup>1</sup>, we prepared RT-COF-1 through minor modification. The following operations were carried out at room temperature unless otherwise stated. TAPB (100 mg, 0.285 mmol) and BTCA (46.1 mg, 0.285 mmol) were added into 5 mL dimethyl sulfoxide (DMSO) at room temperature with vigorous shaking. Both solutions were thoroughly mixed, and after that, 1 ml of 99.8% glacial acetic acid was slowly added under shaking condition. After acetic acid was added, the mixture turned to yellow gel immediately. The gel was repeatedly washed with methanol and tetrahydrofuran three times and dried under vacuum (50 mbar) overnight at room temperature. The obtained product was named RT-COF-1 and then thoroughly ground in a mortar prior.

### **Synthesis of Fe-COF.**

FeSO<sub>4</sub>•7H<sub>2</sub>O (75 mg, 0.3 mmol) and RT-COF-1 (60 mg) were mixed in 36 mL dichloromethane. The mixture was sonicated for 15 min and then kept under stirring condition for 36 h at room temperature. The produced precipitates were washed with dichloromethane three times and collected by centrifugation (10000 rpm for 5 min). Furthermore, the product was dried in vacuum at room temperature for five hours (named Fe-COF). Fe content was 21.75wt% from ICP analyses.

**Peroxidase-like activity assay of Fe-COF.** The peroxidase-like activity of the Fe-COF was evaluated through an oxidation of a chromogenic substrate (TMB) by H<sub>2</sub>O<sub>2</sub>. The standard experiment was described as follows: adding 10 μL Fe-COF (800 μg/mL) into a cuvette consisting of 930 μL of NaAc buffer solution (pH 5), 10 μL of H<sub>2</sub>O<sub>2</sub> (100mM) together with 50 μL of TMB (1mM) and keeping the total volume at 1 mL. Then, after incubating at 25 °C for 20 minutes, the absorbance of the mixed solution was measured at 652 nm.

**Colorimetric determination of H<sub>2</sub>O<sub>2</sub>.** The detection of H<sub>2</sub>O<sub>2</sub> was tested as follows: 10 μL Fe-COF (800 μg/mL) composite was added into a cuvette consisting of H<sub>2</sub>O<sub>2</sub> (10 μL) with different concentrations, 50 μL TMB (1 mM) and 930 μL of buffer solution.

After incubating at 35 °C for 20 minutes, the absorbance of the mixed solution was measured at 652 nm and the standard curve of H<sub>2</sub>O<sub>2</sub> was plotted.

**Determination of H<sub>2</sub>O<sub>2</sub> in milk.** Milk samples were purchased from a local supermarket, and were treated as following steps: 5 ml raw milk was firstly diluted to 10 ml with water. Then the milk sample was centrifuged at 10000 rpm to remove the protein and other organic substances and separate the deposit. Thirdly, the supernatant was filtered through a 0.22 μm membrane (Whatman) to remove lipids. The milk samples containing different concentrations of H<sub>2</sub>O<sub>2</sub> were prepared by adding different volumes of a stock solution of H<sub>2</sub>O<sub>2</sub> (100 mM) to this supernatant. Then, 100 μL of milk sample and 10 μL of Fe-COF (800 μg/mL) were added to the mixture of 840 μL of buffer solution and 50 μL of TMB (1 mM). After incubating at 25 °C for 20 min, the absorbance of the mixed solution was measured at 652 nm.<sup>2,3</sup>

**Selectivity of catalytic determination of H<sub>2</sub>O<sub>2</sub> under Fe-COF.** For the selectivity of catalytic determination of H<sub>2</sub>O<sub>2</sub>, 50 μL of TMB (1 mM), 930 μL of buffer solution and 10 μL of stock solutions (100 mM) of glucose, urea, alanine, glycine, L-Cysteine, glutathione, ascorbic acid, K<sup>+</sup>, Ca<sup>2+</sup>, Na<sup>+</sup>, Zn<sup>2+</sup>, Cl<sup>-</sup>, SO<sub>4</sub><sup>2-</sup> and NO<sub>3</sub><sup>-</sup> were added to 10 μL of Fe-COF (800 μg/mL). The blank solution was composed of 10 μL of Fe-COF (800 μg/mL), 50 μL of TMB (1 mM) and 930 μL of buffer solution. After incubating at 35 °C for 20 min, the absorbance of the mixed solution was measured at 652 nm.

**Degradation of RhB in TMB-H<sub>2</sub>O<sub>2</sub> System.** The degradation of RhB was tested as follows: 50 μL Fe-COF (800 μg/mL) composite was added into 930 μL of buffer solution, 10 μL H<sub>2</sub>O<sub>2</sub> (100 mM), 10 μL RhB (10 mg/mL). After incubating at 35 °C, the absorbance of the mixed solution was measured at 554 nm at different times.

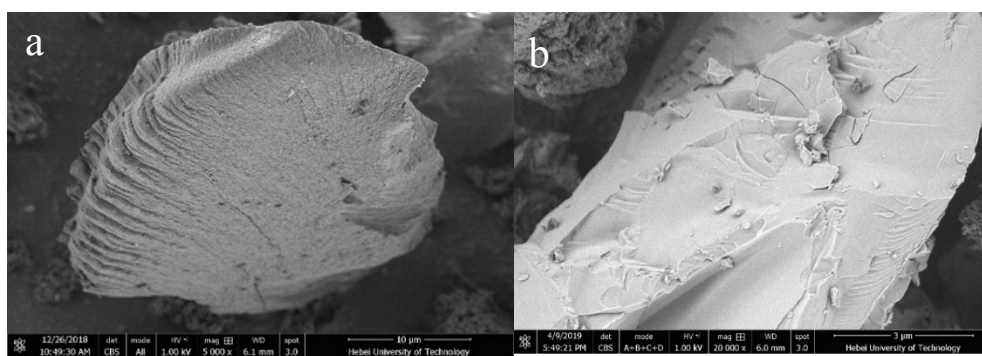

**Fig. S1** SEM images of RT-COF-1 (a) and Fe-COF (b)

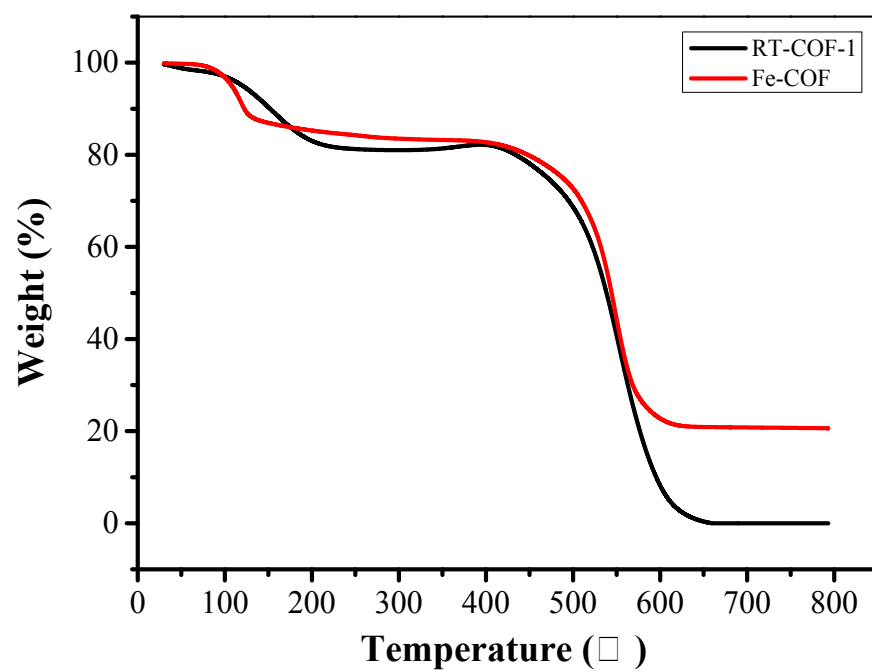

**Fig. S2** TGA curves of RT-COF-1 (black) and Fe-COF (red) in air atmosphere.

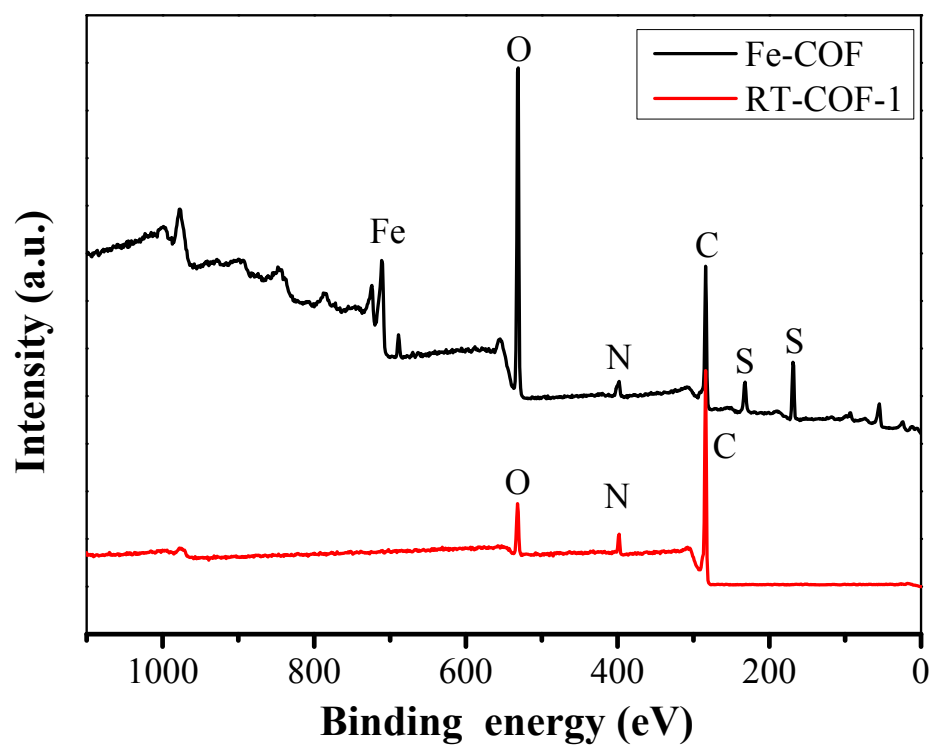

**Fig. S3** XPS spectra of RT-COF-1 (red) and Fe-COF (black).

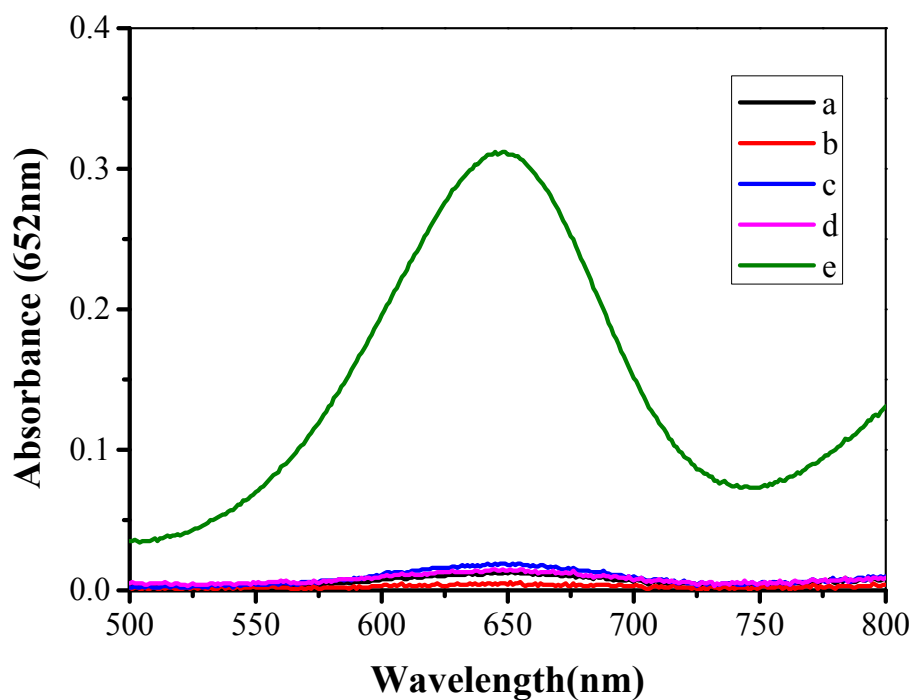

**Fig. S4** UV-vis spectra of (a) TMB + RT-COF-1; (b) TMB + H<sub>2</sub>O<sub>2</sub>; (c) TMB + H<sub>2</sub>O<sub>2</sub> + RT-COF-1; (d) TMB + Fe-COF and (e) TMB + H<sub>2</sub>O<sub>2</sub> + Fe-COF. Conditions: 50  $\mu$ L TMB (1mM, M=mol/L); 10  $\mu$ L H<sub>2</sub>O<sub>2</sub> (100  $\mu$ M); 10  $\mu$ L Fe-COF (800  $\mu$ g/mL) and 930  $\mu$ L NaAc buffer (0.2 M); incubation 10 min in pH 5.0 NaAc buffer at 25  $^{\circ}$ C.



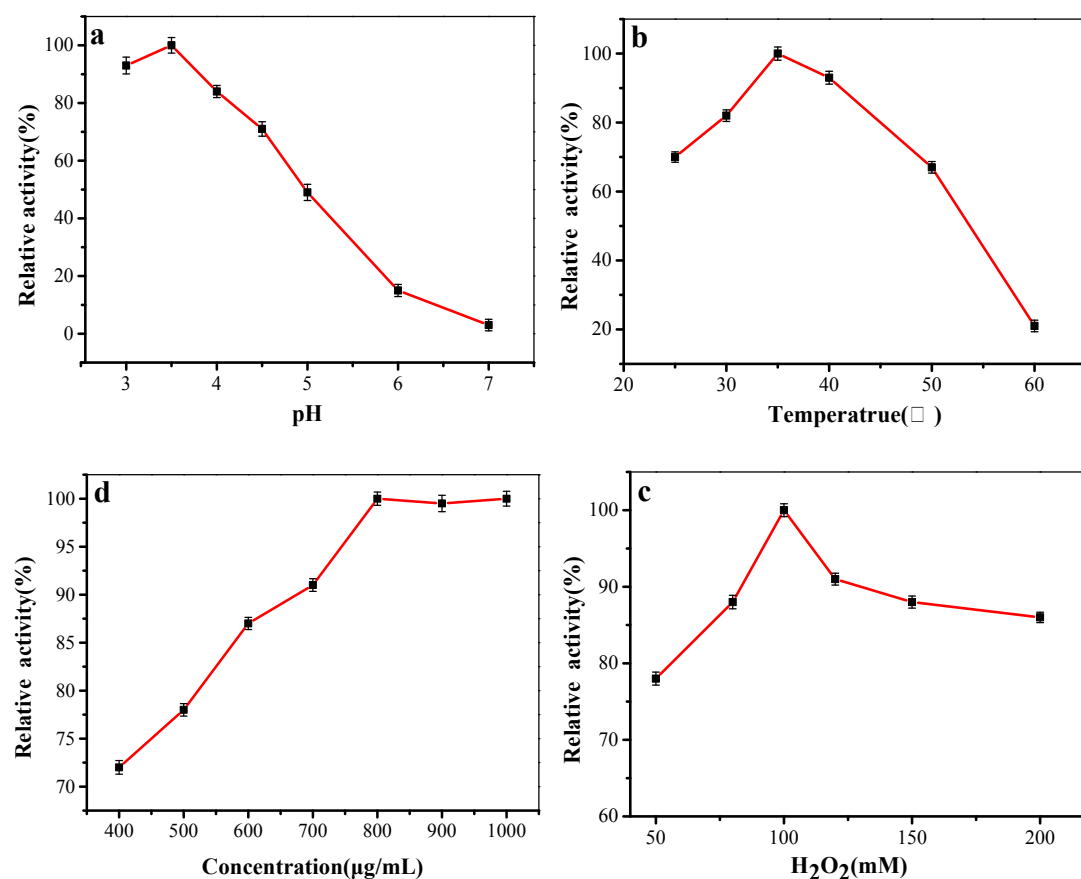

**Fig. S5** Optimization of experimental conditions. (a) The pH of buffer from 3 to 7, (b) the temperature of reaction from 25 to 60°C, (c) the concentration of H<sub>2</sub>O<sub>2</sub> from 50 mM to 200 mM, (d) the concentration of Fe-COF from 400 to 1000 μg/mL. The reactions included 10 μL Fe-COF (800 μg/mL), 50 μL TMB (1 mM), 10 μL H<sub>2</sub>O<sub>2</sub> (100 mM) and 930 μL buffer (0.2 M, pH 5.0) unless otherwise stated. Error bars denote standard deviations based on three measurements. The maximum point in each curve was set as 100 %.

**Table S1** The values of  $K_m$  and  $V_{max}$  of TMB and  $H_2O_2$  compared with the natural enzyme HRP and other mimics.

| Catalyst                   | $K_m/mM$ |          | $V_{max}/M\ s^{-1}$   |                       | Ref       |
|----------------------------|----------|----------|-----------------------|-----------------------|-----------|
|                            | TMB      | $H_2O_2$ | TMB                   | $H_2O_2$              |           |
| HRP                        | 0.434    | 3.700    | $10.0 \times 10^{-8}$ | $8.71 \times 10^{-8}$ | 4         |
| Fe-COF                     | 0.026    | 0.196    | $3.88 \times 10^{-8}$ | $4.69 \times 10^{-8}$ | This work |
| $Fe_3O_4@MIL-100(Fe)$      | 0.112    | 0.077    | $1.14 \times 10^{-7}$ | $1.80 \times 10^{-7}$ | 5         |
| $Fe_3O_4$                  | 0.098    | 3.440    | $154 \times 10^{-8}$  | $9.78 \times 10^{-8}$ | 6         |
| FeS                        | 0.008    | 9.360    | $87 \times 10^{-8}$   | $192 \times 10^{-8}$  | 7         |
| Free-standing<br>Ag@Fabric | 0.190    | 7.610    | $15.1 \times 10^{-8}$ | $14.4 \times 10^{-8}$ | 8         |

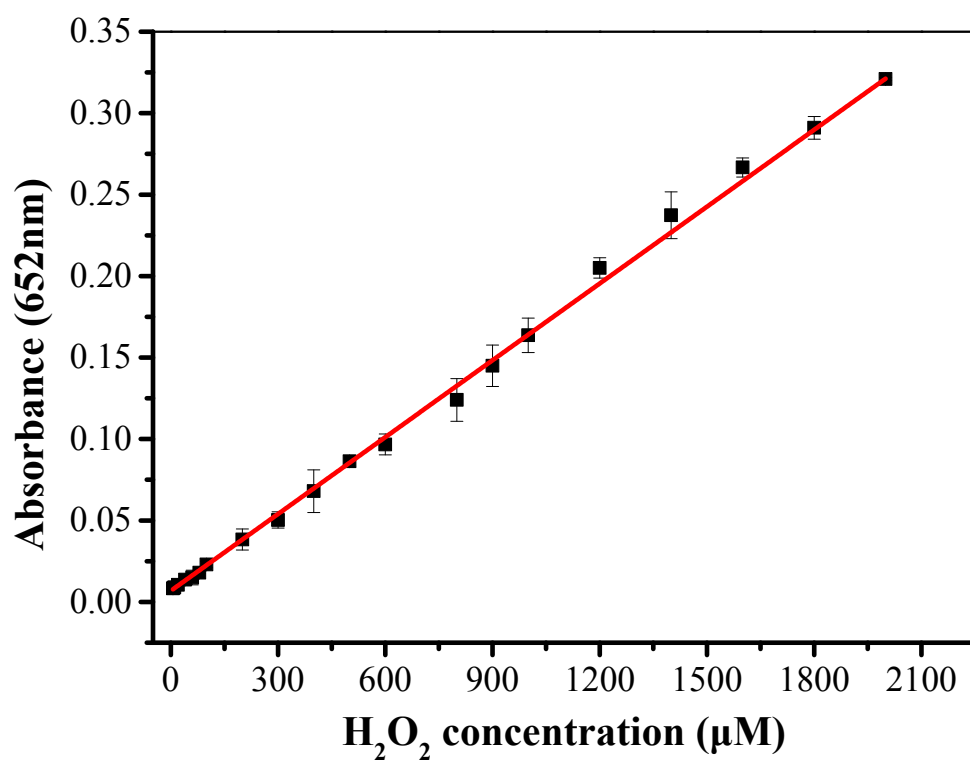

**Fig. S6** The linear range for H<sub>2</sub>O<sub>2</sub> detection using TMB and Fe-COF catalyst.

**Table S2** List of linear range and limit of detection for H<sub>2</sub>O<sub>2</sub> of various mimics.

| Nanomaterials                                      | Method          | Linear range (μM) | LOD     | Ref       |
|----------------------------------------------------|-----------------|-------------------|---------|-----------|
| DNA-CeO <sub>2</sub>                               | Fluorescence    | up to 1000        | 130 nM  | 9         |
| rGO/Ag NPs                                         | Electrochemical | 100-100000        | 31.3 μM | 10        |
| PNEGHNs/GCE                                        | Electrochemical | 1-500             | 80 nM   | 11        |
| Au@Pt NRs                                          | Colorimetric    | 45-1000           | 45μM    | 12        |
| Fe/CuSn(OH) <sub>6</sub>                           | Colorimetric    | 30-1000           | 9.49μM  | 13        |
| PtPdNDs/GNs                                        | Colorimetric    | 0.5-150           | 0.1μM   | 14        |
| H <sub>2</sub> TCPP-Co <sub>3</sub> O <sub>4</sub> | Colorimetric    | 1-75              | 0.4μM   | 15        |
| Fe-COF                                             | Colorimetric    | 10-2000           | 5.6μM   | This work |

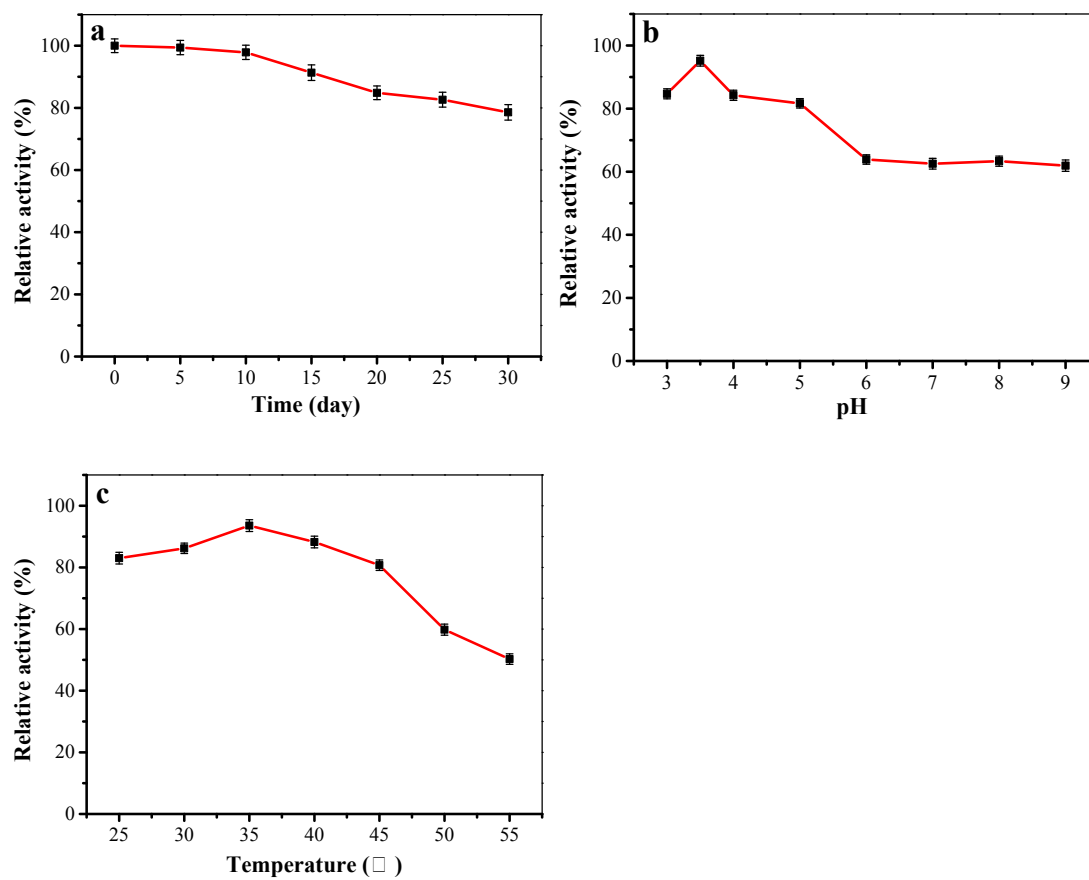

**Fig. S7** Long-term stability (a), relative catalytic activity of Fe-COF after 2 h with incubation in different pHs (3–9) (b) and different temperatures (25–55°C) (c). Unprocessed was set as 100%.

**Table S3** Determinations of H<sub>2</sub>O<sub>2</sub> residue in milk.

| <b>Sample</b> | <b>Added H<sub>2</sub>O<sub>2</sub> (μM)</b> | <b>Detected H<sub>2</sub>O<sub>2</sub> (μM)</b> | <b>Recovery(%)</b> | <b>RSD(%)</b> |
|---------------|----------------------------------------------|-------------------------------------------------|--------------------|---------------|
| <b>Milk 1</b> | 100                                          | 96.27                                           | 96.27%             | 4.55%         |
| <b>Milk 2</b> | 500                                          | 503.49                                          | 100.70%            | 2.01%         |
| <b>Milk 3</b> | 1000                                         | 989.19                                          | 98.92%             | 0.71%         |

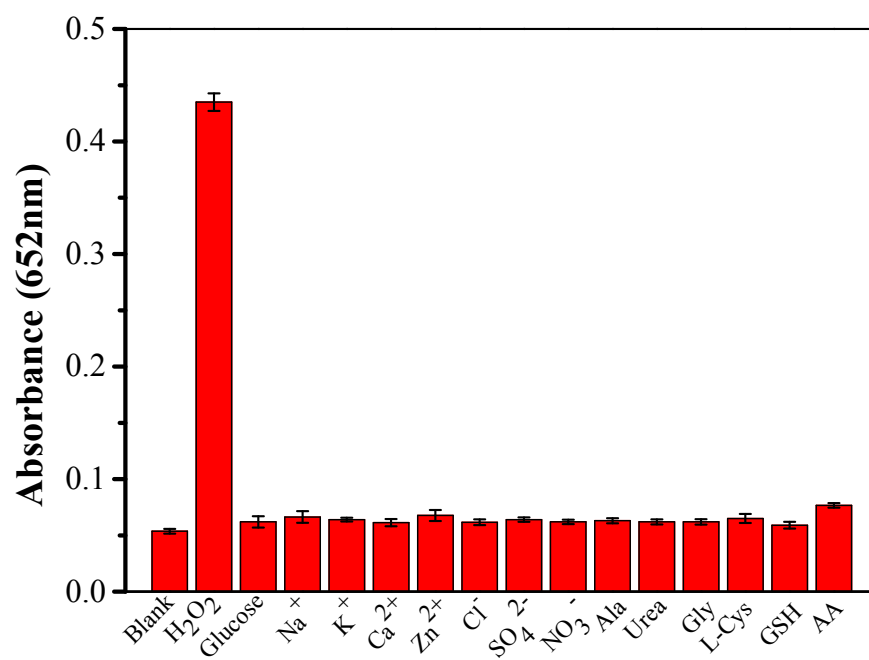

**Fig. S8** The selectivity of the proposed  $\text{H}_2\text{O}_2$  colorimetric sensor.

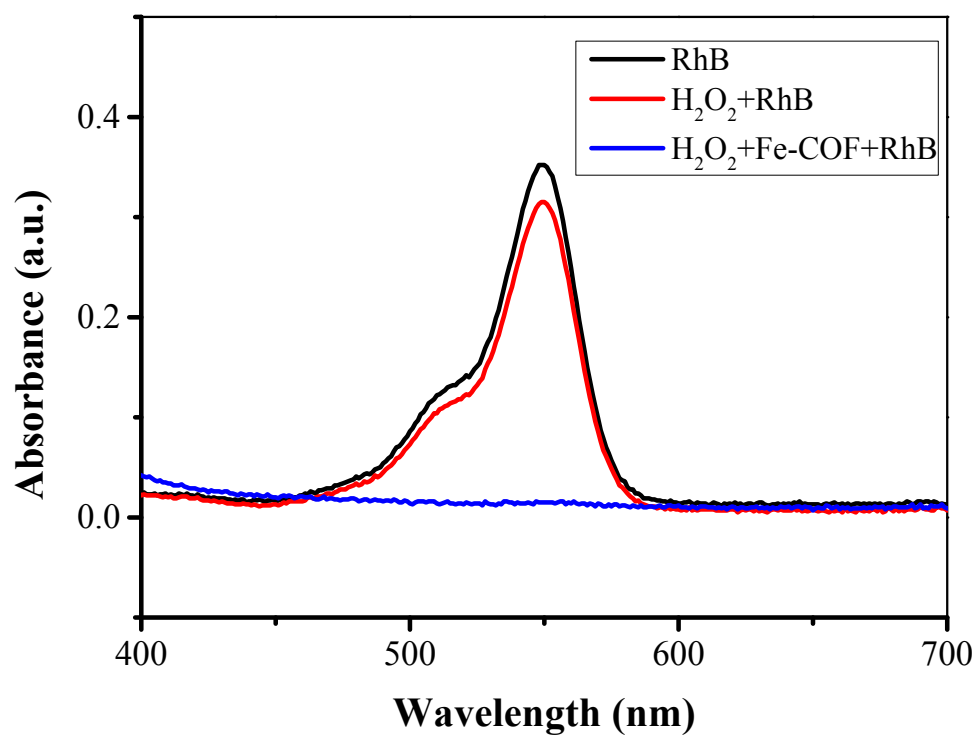

**Fig. S9** UV-vis spectra of RhB (black); RhB + H<sub>2</sub>O<sub>2</sub> (red) and RhB + H<sub>2</sub>O<sub>2</sub> + Fe-COF (blue).



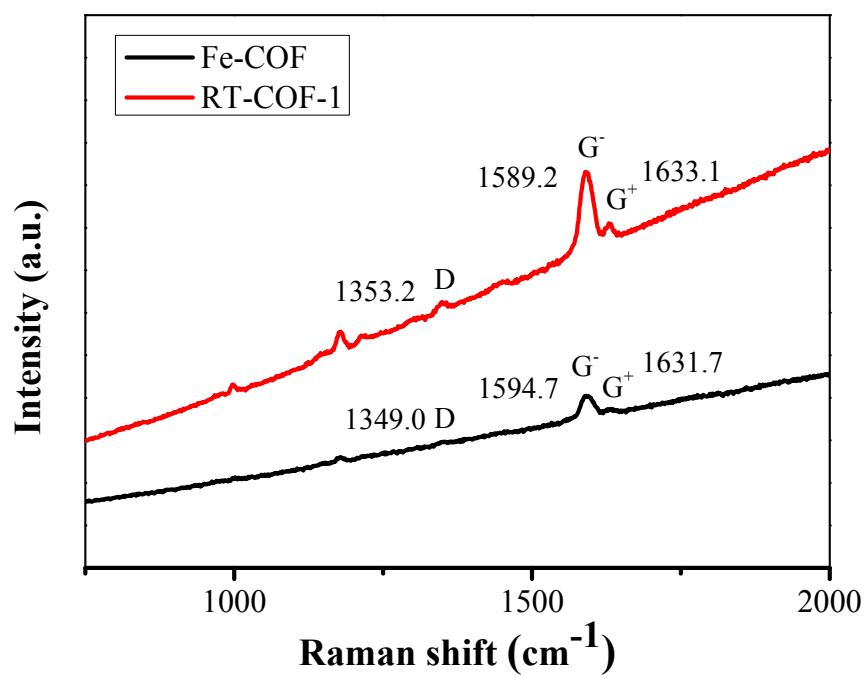

**Fig. S10** Raman spectra of RT-COF-1 and Fe-COF.

**Table S3** Comparison of response time between Fe-COF and other peroxidase mimics.

| <b>System</b>               | <b>chromogenic<br/>substrate</b> | <b>Substrate<br/>concentration</b> | <b>Response<br/>time</b> | <b>Ref.</b> |
|-----------------------------|----------------------------------|------------------------------------|--------------------------|-------------|
| <b>PtAg-MoS<sub>2</sub></b> | TMB                              | 50 mM                              | 30 min                   | 16          |
| <b>Au@Pt</b>                | TMB                              | 6.3 mM                             | 20min                    | 17          |
| <b>PtPdNDs-GNs</b>          | TMB                              | 8 mM                               | 10min                    | 14          |
| <b>Fe-COF</b>               | TMB                              | 1mM                                | 10min                    | This work   |

**Table S4** Comparison Fe-COF and the other materials for dye degradation.

| <b>System</b>                         | <b>Dye</b> | <b>Degradation<br/>efficiency</b> | <b>Degradation<br/>time</b> | <b>Ref.</b> |
|---------------------------------------|------------|-----------------------------------|-----------------------------|-------------|
| <b>ZnFe<sub>2</sub>O<sub>4</sub></b>  | RhB        | 94.2%                             | 120 min                     | 18          |
| <b>Fe@Fe<sub>2</sub>O<sub>3</sub></b> | RhB        | 100.0%                            | 60min                       | 19          |
| <b>Ce (IV)</b>                        | RhB        | 80.0%                             | 60min                       | 20          |
| <b>Fe-COF</b>                         | RhB        | 89.5%                             | 30min                       | This work   |

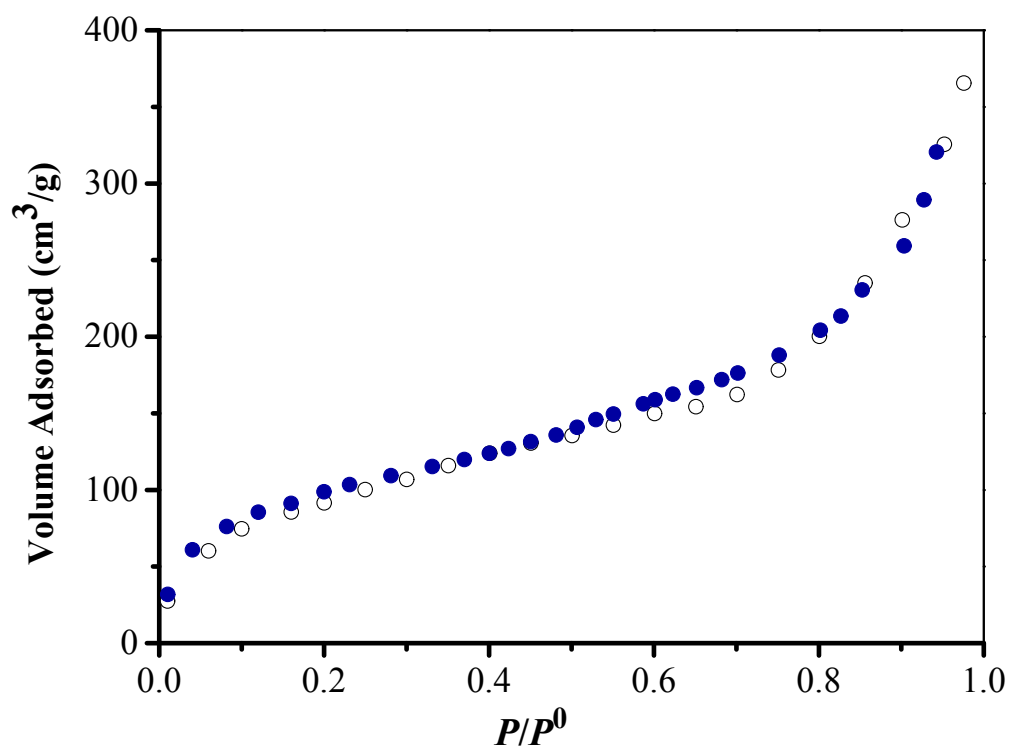

**Fig. S11** N<sub>2</sub> adsorption–desorption isotherms of RT-COF-1

## REFERENCES

1. A. de la Pena Ruigomez, D. Rodriguez-San-Miguel, K. C. Stylianou, M. Cavallini, D. Gentili, F. Liscio, S. Milita, O. M. Roscioni, M. L. Ruiz-Gonzalez, C. Carbonell, D. MasPOCH, R. Mas-Balleste, J. L. Segura and F. Zamora, *Chemistry*, 2015, **21**, 10666-10670.
2. Z. Qi, L. Wang, Q. You and Y. Chen, *Biosens. Bioelectron.* 2017, **96**, 227-232.
3. Y. Lu, W. Ye, Q. Yang, J. Yu, Q. Wang, P. Zhou, C. Wang, D. Xue and S. Zhao, *Sensor. and Actuat. B: Chem.* 2016, **230**, 721-730.
4. Y. Dong, J. Zhang, P. Jiang, G. Wang, X. Wu, H. Zhao and C. Zhang, *New J. Chem.* 2015, **39**, 4141-4146.
5. J. Tian, J. Xu, F. Zhu, T. Lu, C. Su and G. Ouyang, *J. Chromatogr. A*, 2013, **1300**, 2-16.
6. L. Gao, J. Zhuang, L. Nie, J. Zhang, Y. Zhang, N. Gu, T. Wang, J. Feng, D. Yang, S. Perrett and X. Yan, *Nat. Nanotechnol.* 2007, **2**, 577-583.
7. A. K. Dutta, S. K. Maji, D. N. Srivastava, A. Mondal, P. Biswas, P. Paul and B. Adhikary, *ACS Appl. Mater. Interfaces*, 2012, **4**, 1919-1927.
8. M. N. Karim, S. R. Anderson, S. Singh, R. Ramanathan and V. Bansal, *Biosens. Bioelectron.* 2018, **110**, 8-15.
9. B. Liu, Z. Sun, P. J. Huang and J. Liu, *J. Am. Chem. Soc.* 2015, **137**, 1290-1295.
10. S. Liu, J. Tian, L. Wang and X. Sun, *Carbon*, 2011, **49**, 3158-3164.
11. S. Guo, D. Wen, Y. Zhai, S. Dong and E. Wang, *ACS Nano*. 2010, **4**, 3959-3968.
12. J. Liu, X. Hu, S. Hou, T. Wen, W. Liu, X. Zhu, J.-J. Yin and X. Wu, *Sensor. Actuat. B: Chem.* 2012, **166-167**, 708-714.
13. H. Liu, Y.-N. Ding, B. Yang, Z. Liu, X. Zhang and Q. Liu, *ACS Sustain. Chem. Eng.* 2018, **6**, 14383-14393.
14. X. Chen, B. Su, Z. Cai, X. Chen and M. Oyama, *Sensor. Actuat. B: Chem.* 2014, **201**, 286-292.
15. Q. Liu, R. Zhu, H. Du, H. Li, Y. Yang, Q. Jia and B. Bian, *Mater. Sci. Eng. C Mater. Biol. Appl.* 2014, **43**, 321-329.
16. S. Cai, Q. Han, C. Qi, Z. Lian, X. Jia, R. Yang and C. Wang, *Nanoscale*, 2016, **8**, 3685-3693.
17. W. He, Y. Liu, J. Yuan, J. J. Yin, X. Wu, X. Hu, K. Zhang, J. Liu, C. Chen, Y. Ji and Y. Guo, *Biomater.* 2011, **32**, 1139-1147.
18. Y. Guo, Y. Guo, D. Tang, Y. Liu, X. Wang, P. Li and G. Wang, *J. Alloy. Compd.* 2019, 781, 1101-1109.
19. Z. Ai, L. Lu, J. Li, L. Zhang, J. Qiu and M. Wu, *The J. Phys. Chem. C*, 2007, 111, 4087-4093.
20. S. Wang, Y. Jia, L. Song and H. Zhang, *ACS Omega*, 2018, 3, 18456-18465.
